# Supplementary material
Source: publisher figshare collection journal article supplement (https://tandf.figshare.com/articles/dataset/_/3860856)
Supplement: Supplementary file 2 [file 1]

Archive with 3 entries (3 files):
- TCON_A_1233482_SUP_Answers1.pdf
- TCON_A_1233482_SUP_Answers2.pdf
- TCON_A_1233482_SUP_Answers3.pdf
