# Supplementary material
Source: publisher figshare collection journal article supplement (https://tandf.figshare.com/articles/dataset/_/3860856)
Supplement: Supplementary file 2 [file 1 › TCON_A_1233482_SUP_Answers3.pdf]

June 17, 2016

Dear Reviewer,

I would like to thank you for your valuable comments and question. Please find attached the new version of the article that integrate the relevant given recommendations. In addition, answers to your comments are given as follows

1. **In Definition 2, clarify the set  $\Delta_v$ .**

Answer: The set  $\Delta_v$  is well defined in the new version.

2. **In equation (10), use math font.**

Answer: The omitted mathematical font is now used for equation (10) in the new version.

3. **The conditions in (35) and (36) are necessary for the derivation of the error bounds, and is a main contribution of this work. It is therefore of interest to comment on these conditions.**

Answer: This idea is introduced first in [GJ90]. It means that the column space of  $B(\rho)$  must be a sub-space of that of  $B_\Omega(\rho)$  and the row space of  $C(\rho)$  must be a sub-space of that of  $C_\Omega(\rho)$ , i.e  $\exists K, L$  with suitable dimension so that  $B(\rho) = B_\Omega(\rho)K$  and  $C(\rho) = LB_\Omega(\rho)$  with  $K$  and  $L$  have the suitable dimensions. Moreover, based in generic rank characterisation introduced in [AC81], it was shown in [WSL99] that this assumption hold for almost all the cases. Indeed, during our simulations, the assumption has always been satisfied. In the new version this comment is given in remark 1.

4. **There are quite a few typos and grammatical errors.**

Answer: There were many typos in the initial version, the English of the paper was reviewed and improved.

Yours sincerely,
